# Supplementary material for: A fast Myosin super enhancer dictates muscle fiber phenotype through competitive interactions with Myosin genes
Source: PubMed Central journal article supplement (PMC8873246; doi:10.1038/s41467-022-28666-1), 2022-02-24
Supplement: 41467_2022_28666_MOESM3_ESM.pdf [file 41467_2022_28666_MOESM3_ESM.pdf]

## Reporting Summary

Nature Portfolio wishes to improve the reproducibility of the work that we publish. This form provides structure for consistency and transparency in reporting. For further information on Nature Portfolio policies, see our [Editorial Policies](#) and the [Editorial Policy Checklist](#).

### Statistics

For all statistical analyses, confirm that the following items are present in the figure legend, table legend, main text, or Methods section.

n/a Confirmed

- ☐ ☒ The exact sample size ( $n$ ) for each experimental group/condition, given as a discrete number and unit of measurement
- ☐ ☒ A statement on whether measurements were taken from distinct samples or whether the same sample was measured repeatedly
- ☐ ☒ The statistical test(s) used AND whether they are one- or two-sided  
*Only common tests should be described solely by name; describe more complex techniques in the Methods section.*
- ☐ ☒ A description of all covariates tested
- ☒ ☐ A description of any assumptions or corrections, such as tests of normality and adjustment for multiple comparisons
- ☐ ☒ A full description of the statistical parameters including central tendency (e.g. means) or other basic estimates (e.g. regression coefficient) AND variation (e.g. standard deviation) or associated estimates of uncertainty (e.g. confidence intervals)
- ☐ ☒ For null hypothesis testing, the test statistic (e.g.  $F$ ,  $t$ ,  $r$ ) with confidence intervals, effect sizes, degrees of freedom and  $P$  value noted  
*Give  $P$  values as exact values whenever suitable.*
- ☒ ☐ For Bayesian analysis, information on the choice of priors and Markov chain Monte Carlo settings
- ☒ ☐ For hierarchical and complex designs, identification of the appropriate level for tests and full reporting of outcomes
- ☒ ☐ Estimates of effect sizes (e.g. Cohen's  $d$ , Pearson's  $r$ ), indicating how they were calculated

*Our web collection on [statistics for biologists](#) contains articles on many of the points above.*

### Software and code

Policy information about [availability of computer code](#)

Data collection

Data analysis

For manuscripts utilizing custom algorithms or software that are central to the research but not yet described in published literature, software must be made available to editors and reviewers. We strongly encourage code deposition in a community repository (e.g. GitHub). See the Nature Portfolio [guidelines for submitting code & software](#) for further information.

### Data

Policy information about [availability of data](#)

All manuscripts must include a [data availability statement](#). This statement should provide the following information, where applicable:

- Accession codes, unique identifiers, or web links for publicly available datasets
- A description of any restrictions on data availability
- For clinical datasets or third party data, please ensure that the statement adheres to our [policy](#)

## Field-specific reporting

# Life sciences study design

All studies must disclose on these points even when the disclosure is negative.

|                 |                                                                                                                                                                                                                                                                                                                                                                                                                                                                                                                |
|-----------------|----------------------------------------------------------------------------------------------------------------------------------------------------------------------------------------------------------------------------------------------------------------------------------------------------------------------------------------------------------------------------------------------------------------------------------------------------------------------------------------------------------------|
| Sample size     | SnATAC-seq experiments have been published already (Dos Santos et al, 2020). For4C-seq experiments, we used more than ten animals per condition. This number of animals is sufficient to obtain statistically significant differences. Significant differences between mean values were evaluated using two-way ANOVA or t-Student tests with Graphpad 6 software.                                                                                                                                             |
| Data exclusions | We excluded no data.                                                                                                                                                                                                                                                                                                                                                                                                                                                                                           |
| Replication     | For all experiments, three biological replicates were used for each condition, giving rise to the same results.                                                                                                                                                                                                                                                                                                                                                                                                |
| Randomization   | Experiments have been performed randomly. Samples were allocated into experimental groups randomly depending on the condition.                                                                                                                                                                                                                                                                                                                                                                                 |
| Blinding        | The investigators were not blinded in regard to allocation of samples during experiments and outcome assessment because of technical limitation and impossibility of blinding the investigators.<br>Moreover, the blinding is used mainly in the case of clinical studies where the number and the variations between samples are high.<br>In our study (fundamental research), we use inbred mouse lines reducing the interindividual variability. The different samples were treated as equally as possible. |

# Reporting for specific materials, systems and methods

We require information from authors about some types of materials, experimental systems and methods used in many studies. Here, indicate whether each material, system or method listed is relevant to your study. If you are not sure if a list item applies to your research, read the appropriate section before selecting a response.

## Materials & experimental systems

| n/a                                 | Involved in the study                                           |
|-------------------------------------|-----------------------------------------------------------------|
| <input type="checkbox"/>            | <input checked="" type="checkbox"/> Antibodies                  |
| <input checked="" type="checkbox"/> | <input type="checkbox"/> Eukaryotic cell lines                  |
| <input checked="" type="checkbox"/> | <input type="checkbox"/> Palaeontology and archaeology          |
| <input type="checkbox"/>            | <input checked="" type="checkbox"/> Animals and other organisms |
| <input checked="" type="checkbox"/> | <input type="checkbox"/> Human research participants            |
| <input checked="" type="checkbox"/> | <input type="checkbox"/> Clinical data                          |
| <input checked="" type="checkbox"/> | <input type="checkbox"/> Dual use research of concern           |

## Methods

| n/a                                 | Involved in the study                           |
|-------------------------------------|-------------------------------------------------|
| <input checked="" type="checkbox"/> | <input type="checkbox"/> ChIP-seq               |
| <input checked="" type="checkbox"/> | <input type="checkbox"/> Flow cytometry         |
| <input checked="" type="checkbox"/> | <input type="checkbox"/> MRI-based neuroimaging |

## Antibodies

|                 |                                                                                                                                                                                                                                                                                                                                                                                                                                                                                                                                                                                                                                                                                                                               |
|-----------------|-------------------------------------------------------------------------------------------------------------------------------------------------------------------------------------------------------------------------------------------------------------------------------------------------------------------------------------------------------------------------------------------------------------------------------------------------------------------------------------------------------------------------------------------------------------------------------------------------------------------------------------------------------------------------------------------------------------------------------|
| Antibodies used | <p>Target Antibody reference Supplier Species dilution</p> <p>Myh7 BA-F8 DHSB mouse IgG2B 1/40.</p> <p>Myh2 SC-71 DHSB mouse IgG1 1/200</p> <p>Myh1 6H1 DHSB mouse IgM 1/40.</p> <p>Myh4 BF-F3 DHSB mouse IgM 1/200</p> <p>Laminin L9393 Sigma Rabbit 1/500</p> <p>Myh3 BF-45 DHSB mouse IgG1 1/200</p> <p>Myh8 N3.36 DHSB mouse IgG2a 1/200</p> <p>Myh13 4A6 DHSB mouse IgM 1/200</p> <p>GFP ab290 Abcam Chicken 1/200</p> <p>Goat anti mouse IgG2b-350 A21140 Invitrogen, 1/500</p> <p>Goat anti mouse IgG1-546 A21123 Invitrogen, 1/1000</p> <p>Goat anti mouse IgM-647 A21238 Invitrogen, 1/1000</p> <p>Goat anti rabbit IgG-488 A11008 Invitrogen, 1/1000</p> <p>Goat anti chicken IgG-488 A11039 Invitrogen, 1/1000</p> |
| Validation      | <p>The antibodies have been validated by several studies as specified by:</p> <p>PMID: 22530000 for Myh antibodies</p> <p>PMID: 29733324 for Laminin antibodies</p> <p>For GFP antibodies ab290 Abcam, PMID: 32123325</p>                                                                                                                                                                                                                                                                                                                                                                                                                                                                                                     |

## Animals and other organisms

Policy information about [studies involving animals](#); [ARRIVE guidelines](#) recommended for reporting animal research

|                         |                                                                                                                                                                                                                                                                                                                                                                                                                           |
|-------------------------|---------------------------------------------------------------------------------------------------------------------------------------------------------------------------------------------------------------------------------------------------------------------------------------------------------------------------------------------------------------------------------------------------------------------------|
| Laboratory animals      | 6-8 weeks old C57bl6N females were used in this study. Mice were maintained at temperature 22+/-2 °C, with 30 to 70% humidity and with a dark/light cycle of 12h/12h.                                                                                                                                                                                                                                                     |
| Wild animals            | No wild animals were used.                                                                                                                                                                                                                                                                                                                                                                                                |
| Field-collected samples | No field collected samples.                                                                                                                                                                                                                                                                                                                                                                                               |
| Ethics oversight        | Animal experimentations were carried out in strict accordance with the European STE123 and the French national charter of Ethics of Animal Experimentation. Protocols were approved by the Ethical Committee of Animal experiments of the Institut Cochin, CNRS UMR 8104, INSERM U1016, and by the Ministère de l'Éducation nationale, de l'enseignement supérieur et de la recherche, n° APAFIS #15699-2018021516569195. |

Note that full information on the approval of the study protocol must also be provided in the manuscript.
